# Supplementary material for: Eukaryotic ribosome quality control system: a potential therapeutic target for human diseases
Source: PubMed Central journal article supplement (PMC8990456; doi:10.7150/ijbs.70955), 2022-03-14
Supplement: ijbsv18p2497s1.pdf [file ijbsv18p2497s1.pdf]

**Supplemental Table 1. Dedicated chaperones and corresponding ribosome proteins**

| <b>Year</b> | <b>Authors</b>         | <b>Dedicated chaperones</b> | <b>Ribosome proteins</b> | <b>References</b> |
|-------------|------------------------|-----------------------------|--------------------------|-------------------|
| 1997        | Eisinger DP            | Sqt1                        | Rpl10                    | 45                |
| 2001        | Iouk TL                | Rrb1                        | Rpl3                     | 43                |
| 2012        | Kressler D             | Syo1                        | Rpl1/ Rpl5               | 46                |
| 2012        | Koch B                 | Yar1                        | Rps3                     | 48                |
| 2014        | Loc'h J                | Fap7                        | Rps14                    | 49                |
| 2014        | Schütz S               | Tsr2                        | Rps26                    | 50                |
| 2015        | Pillet B and Stelter P | Acl4                        | Rpl4                     | 42,44             |
| 2017        | Ting YH                | Bcp1                        | Rpl23                    | 41                |
| 2019        | Liang KJ               | Puf6 /Loc1                  | Rpl43                    | 38                |
| 2019        | Black JJ and Rössler I | Tsr4                        | Rps2                     | 39,40             |
| 2019        | Rössler I              | Nap1                        | Rps6                     | 40                |
